# Supplementary material for: Unlocking the Untapped Potential of Endothelial Kinase and Phosphatase Involvement in Sepsis for Drug Treatment Design
Source: PubMed Central journal article supplement (PMC9136877; doi:10.3389/fimmu.2022.867625), 2022-05-13
Supplement: Table_1.pdf [file Table_1.pdf]

Supplementary Table 1. Summary of consulted references to construct the signal transduction pathway schematics

| NF- $\kappa$ B-related connections         |                   |                                        |                                                  |                                                                                                                                                   |                                                                                               |                      |
|--------------------------------------------|-------------------|----------------------------------------|--------------------------------------------------|---------------------------------------------------------------------------------------------------------------------------------------------------|-----------------------------------------------------------------------------------------------|----------------------|
| Interaction                                | In vitro/vivo     | Endogenous pathway or overexpression   | Treatment / Intervention                         | Effect                                                                                                                                            | Miscellaneous                                                                                 | Author               |
| TNF $\alpha$ activates IKK                 | In vitro (HUVEC)  | Endogenous pathway                     | TNF $\alpha$                                     | TNF $\alpha$ increased IKK protein phosphorylation status                                                                                         | 30 min TNF $\alpha$ stimulation                                                               | Zheng et al. (2013)  |
| LPS activates IKK                          | In vitro (HPMEC)  | Endogenous pathway                     | LPS                                              | LPS increased IKK $\beta$ protein phosphorylation status                                                                                          | 12 min LPS stimulation                                                                        | Menden et al. (2013) |
| LPS activates RIG-I + TLR4                 | In vitro (HUVEC)  | Endogenous pathway                     | LPS + RIG-I siRNA + TLR4 siRNA                   | LPS-induced increases in mRNA levels of E-selectin/VCAM-1/ICAM-1/IL-6/IL-8 were reduced similarly by either RIG-I siRNA or TLR4 siRNA             | 4 h LPS stimulation                                                                           | Moser et al. (2016)  |
| RIG-I activates NF- $\kappa$ B pathway     | In vitro (HUVEC)  | Endogenous pathway                     | LPS + RIG-I siRNA                                | LPS-induced reduction in I $\kappa$ B protein levels was abolished by RIG-I siRNA                                                                 | 30 min LPS stimulation                                                                        |                      |
| TNF $\alpha$ activates RIG-I               | In vitro (HUVEC)  | Endogenous pathway                     | TNF $\alpha$ + RIG-I siRNA                       | TNF $\alpha$ -induced increase in mRNA levels of E-selectin/VCAM-1/ICAM-1/IL-6/IL-8 was decreased by RIG-I siRNA                                  | 4 h TNF $\alpha$ stimulation                                                                  |                      |
| TNF $\alpha$ activates RhoA                | In vitro (Bend.3) | Transduced with dominant negative RhoA | TNF $\alpha$                                     | TNF $\alpha$ increased WT RhoA activation levels + TNF $\alpha$ -induced TEER reduction was alleviated in cells expressing dominant negative RhoA | Effect of TNF $\alpha$ on RhoA activation visible after 1 min, effect on TEER between 0.5-3 h | Peng et al. (2011)   |
| Thrombin-activated RhoA/ROCK activates IKK | In vitro (HUVEC)  | Endogenous pathway                     | Thrombin + pharmacological ROCK-inhibitor Y27632 | Thrombin increased IKK protein phosphorylation status, which was reverted by Y27632 pretreatment                                                  | 1 h thrombin stimulation                                                                      | Anwar et al. (2004)  |

### Rac1/RhoA GTPases-related connections

| Interaction                 | In vitro/vivo                          | Endogenous pathway or overexpression                                                                                                               | Treatment / Intervention                                           | Effect                                                                                                                                                                                                                      | Miscellaneous                                                                                                            | Author                |
|-----------------------------|----------------------------------------|----------------------------------------------------------------------------------------------------------------------------------------------------|--------------------------------------------------------------------|-----------------------------------------------------------------------------------------------------------------------------------------------------------------------------------------------------------------------------|--------------------------------------------------------------------------------------------------------------------------|-----------------------|
| Rac1 inhibits RhoA          | In vitro (HMVEC-Lung)                  | Endogenous pathway                                                                                                                                 | Angpt1 + p190 RhoGAP siRNA                                         | Angpt1 activated Rac1 and inactivated RhoA, but RhoA activity increased with p190 RhoGAP siRNA pretreatment                                                                                                                 | 30 min Angpt1 stimulation                                                                                                | Mammoto et al. (2007) |
|                             | In vivo (mice)                         | Endogenous pathway                                                                                                                                 | Angpt1 + LPS + p190 RhoGAP siRNA                                   | Angpt1 protected against LPS-induced vascular leakage in the lung, but this effect was blocked by p190 RhoGAP siRNA pretreatment                                                                                            | 8 h after first Angpt1 dose, mice were co-injected with Angpt1 and LPS. Mice were sacrificed 16 h after second injection |                       |
| RhoA inhibits Rac1 via ROCK | In vitro (HEK293)                      | Transfected with constitutively active ROCK (ROCK <sup>A3</sup> ) and FilGAP or FilGAP with mutated phosphorylation sites (FilGAP <sup>STA</sup> ) |                                                                    | Activated Rac1 levels were decreased by ROCK <sup>A3</sup> , this decrease was even more pronounced in presence of FilGAP. This additional decrease in Rac1 activity was abolished in the presence of FilGAP <sup>STA</sup> |                                                                                                                          | Ohta et al. (2006)    |
| RhoA activates ROCK         | In vitro (HUVEC)                       | Endogenous pathway                                                                                                                                 | Thrombin + Rho-binding domain of ROCK, or catalytic domain of ROCK | Thrombin-induced formation of stress fibres was inhibited by Rho-binding domain of ROCK. Administration of catalytic domain of ROCK mimicked effects of thrombin.                                                           | 15 min thrombin stimulation                                                                                              | Essler et al. (1998)  |
| ROCK phosphorylates MLCP    | Proteins isolated from human platelets | Constitutively activated ROCK (GST-ROCK)                                                                                                           | Staurosporine (pharmacological inhibitor of ROCK)                  | Staurosporine reverted GST-ROCK-induced increase in phosphorylation of MLCP-subunit and reduction in MLCP activity                                                                                                          | 20 min GST-ROCK stimulation                                                                                              | Nakai et al. (1997)   |
| Rac1 inhibits MLCK          | In vitro (HeLa)                        | Transfected with constitutively active PAK1 (T423E)                                                                                                |                                                                    | T423E decreases MLCK activity, indicated by decreased MLC protein phosphorylation status                                                                                                                                    | PAK1 is downstream of Rac1                                                                                               | Sanders et al. (1999) |

|                                                               |                                                              |                                                                 |                                                                                       |                                                                                                                                             |                                                                                               |                                |
|---------------------------------------------------------------|--------------------------------------------------------------|-----------------------------------------------------------------|---------------------------------------------------------------------------------------|---------------------------------------------------------------------------------------------------------------------------------------------|-----------------------------------------------------------------------------------------------|--------------------------------|
| Cortical actin assembly protects barrier function             | In vitro (HUVEC)                                             | Endogenous pathway                                              | Cytochalasin D (depolymerises actin) + FSK (pharmacological adenyl cyclase activator) | FSK enhances endothelial barrier function via increased cortical actin assembly, but fails to do so after pre-treatment with cytochalasin D | 30 min FSK treatment                                                                          | Fukuhara et al. (2005)         |
| Rac1 leads to cortical actin assembly                         | In vitro (porcine pulmonary artery endothelial cells; PPAEC) | Transfected with constitutively activated Rac1 mutant (V12Rac1) | Hypoxia                                                                               | V12Rac1 prevented hypoxia-induced stress fibre formation and decreased permeability                                                         | After 48 h (normoxia), V12Rac1 increased permeability as a result of a loss of cortical actin | Wojciak-Stothard et al. (2005) |
| RhoA-induced stress fibre formation disrupts barrier function | In vitro (PPAEC)                                             | Transfected with dominant negative RhoA mutant (N19RhoA)        | Hypoxia                                                                               | Hypoxia-induced stress fibre formation and permeability were abolished in cells expressing N19RhoA                                          |                                                                                               |                                |

**AP-1-related connections**

| <b>Interaction</b>              | <b>In vitro/vivo</b>    | <b>Endogenous pathway or overexpression</b>                                                                 | <b>Treatment / Intervention</b>                                                       | <b>Effect</b>                                                                                                                   | <b>Miscellaneous</b>                                                                     | <b>Author</b>               |
|---------------------------------|-------------------------|-------------------------------------------------------------------------------------------------------------|---------------------------------------------------------------------------------------|---------------------------------------------------------------------------------------------------------------------------------|------------------------------------------------------------------------------------------|-----------------------------|
| TNF $\alpha$ activates JNK      | In vitro (HUVEC)        | Endogenous pathway                                                                                          | TNF $\alpha$                                                                          | TNF $\alpha$ increased JNK activity, illustrated by increased c-Jun protein phosphorylation status                              | 0-60 min TNF $\alpha$ stimulation                                                        | Surapisitchat et al. (2001) |
| TNF $\alpha$ activates p38      |                         |                                                                                                             |                                                                                       | TNF $\alpha$ increased p38 activity, illustrated by increased p38 protein phosphorylation status                                |                                                                                          |                             |
| TNFR1 activates Ras/ERK pathway | In vitro (HMVEC-dermal) | Endogenous pathway                                                                                          | 48 h recovery after Raf antisense oligonucleotide treatment, followed by TNF $\alpha$ | TNF $\alpha$ -induced increase in ELK protein phosphorylation status was reduced by Raf antisense oligonucleotides pretreatment | 15 min TNF $\alpha$ stimulation. ELK and RAF are downstream of ERK and Ras, respectively | Xu et al. (1998)            |
| TLR4 activates ERK              | In vitro (HUVEC)        | Endogenous pathway                                                                                          | LPS                                                                                   | LPS increased ERK activity                                                                                                      | 2 h LPS stimulation                                                                      | Jersmann et al. (2001)      |
| TLR4 activates JNK              |                         |                                                                                                             |                                                                                       | LPS increased JNK activity                                                                                                      |                                                                                          |                             |
| TLR4 activates p38              |                         |                                                                                                             |                                                                                       | LPS increased p38 activity                                                                                                      |                                                                                          |                             |
| RhoA activates p38              | In vitro (HUVEC)        | Endogenous pathway                                                                                          | LPS + RhoA siRNA                                                                      | LPS-induced increase in p38 protein phosphorylation status was reduced after RhoA knockdown                                     | 0-60 min LPS stimulation                                                                 | Guo et al. (2012)           |
|                                 | In vitro (HEK293)       | Transfection with m1 muscarinic acetylcholine receptor, GST-MKK6, and dominant negative RhoA mutant RhoT19N | Carbachol                                                                             | Carbochol-induced increase in p38 protein phosphorylation status was abolished by RhoT19N                                       |                                                                                          | Yamauchi et al. (2001)      |
| Rac1 activates p38              |                         | Transfection with m1 muscarinic acetylcholine receptor, GST-MKK6, and dominant negative                     |                                                                                       | Carbochol-induced increase in p38 protein phosphorylation status was abolished by RacT17N                                       |                                                                                          |                             |

|                                              |                                              |                                                                                                     |                                                       |                                                                                                                                                                                                                             |                                                                                           |                        |
|----------------------------------------------|----------------------------------------------|-----------------------------------------------------------------------------------------------------|-------------------------------------------------------|-----------------------------------------------------------------------------------------------------------------------------------------------------------------------------------------------------------------------------|-------------------------------------------------------------------------------------------|------------------------|
|                                              |                                              | Rac1 mutant RacT17N                                                                                 |                                                       |                                                                                                                                                                                                                             |                                                                                           |                        |
| RhoA activates JNK                           | In vitro (HEK293)                            | Transfection with GST-MKK4, Gβ1, Gγ2, and dominant negative RhoA mutant RhoT19N                     |                                                       | Gβ1/ Gγ2-induced increase in c-Jun protein phosphorylation status and increased MKK4 activity were abolished by RhoT19N                                                                                                     |                                                                                           | Yamauchi et al. (1999) |
| Rac1 activates JNK                           |                                              | Transfection with GST-MKK7, Gβ1, Gγ2, and dominant negative Rac1 mutant RacT17N                     |                                                       | Gβ1/ Gγ2-induced increase in c-Jun protein phosphorylation status and increased MKK7 activity were abolished by RacT17N                                                                                                     |                                                                                           |                        |
| ERK induces c-Fos transcription              | In vitro (HeLa)                              | Transfection with activated Raf (RafBxB), ERK2, c-Fos reporter pWTGL3, and dominant negative CREBm1 |                                                       | RafBxB/ERK2-induced increase in c-Fos transcription was inhibited by CREBm1                                                                                                                                                 | CREB is located downstream of ERK and is required for transcriptional activation of c-Fos | Wang et al. (2000)     |
| ERK phosphorylates c-Fos                     | In vitro (non-specified; presumably NIH 3T3) | Overexpressing WT c-Fos or c-Fos-m                                                                  | MEK EE (constitutively active MEK1) + ERK2 + GST-Pin1 | MEK EE + ERK2 induced c-Fos protein phosphorylation and subsequent interaction with Pin1 in WT c-Fos, but not in c-Fos-m                                                                                                    | c-Fos-m had mutated ERK-phosphorylation sites                                             | Monje et al. (2005)    |
| JNK induces c-Jun transcription              | In vitro (MEF)                               | Cells derived from <i>jnk</i> <sup>-/-</sup> knockout mice                                          | EGF                                                   | EGF-stimulated increase in c-Jun mRNA and protein levels in WT MEFs was inhibited in <i>jnk</i> <sup>-/-</sup> cells                                                                                                        | 0-120 min EGF stimulation                                                                 | Kayahara et al. (2005) |
| p38 inhibits JNK-induced c-Jun transcription |                                              |                                                                                                     | EGF + pharmacological p38 inhibitor SB203580          | EGF-stimulated increase in c-Jun mRNA and protein levels in WT MEFs was further increased by SB203580 pretreatment. No effect of SB203580 was observed in <i>jnk</i> <sup>-/-</sup> cells. SB203580 increased JNK activity. |                                                                                           |                        |
| ERK induces c-Jun transcription              |                                              |                                                                                                     | EGF + pharmacological                                 | EGF-stimulated increase in c-Jun mRNA and protein levels in                                                                                                                                                                 |                                                                                           |                        |

|                                     |                   |                                                                                                                               |                                                                                  |                                                                                                                                                                                      |                                                                           |                           |
|-------------------------------------|-------------------|-------------------------------------------------------------------------------------------------------------------------------|----------------------------------------------------------------------------------|--------------------------------------------------------------------------------------------------------------------------------------------------------------------------------------|---------------------------------------------------------------------------|---------------------------|
|                                     |                   |                                                                                                                               | ERK inhibitor<br>PD184352                                                        | WT MEFs was inhibited by PD184352 pretreatment for early (15-30m) but not for late (60m) c-Jun mRNA levels                                                                           |                                                                           |                           |
| JNK phosphorylates c-Jun            | In vitro (MEF)    | Cells derived from jnk <sup>-/-</sup> knockout mice                                                                           | TPA                                                                              | TPA induced c-Jun protein phosphorylation at several sites was inhibited in jnk <sup>-/-</sup> cells                                                                                 | 30 min TPA stimulation                                                    | Morton et al. (2003)      |
| p38 inhibits ERK                    | In vitro (HUVEC)  | Endogenous pathway                                                                                                            | Angpt1 + pharmacological p38 inhibitor SB203580                                  | SB203580 pretreatment further increased Angpt1-induced increase in ERK protein phosphorylation status                                                                                | 5-60 min Angpt1 stimulation                                               | Abdel-Malak et al. (2008) |
| p38 induces c-Jun transcription     | In vitro (HUVEC)  | Endogenous pathway                                                                                                            | Pharmacological PI3K inhibitor LY294002 + pharmacological p38 inhibitor SB203580 | LY294002 increased ATF-2 protein phosphorylation status, which was abolished upon treatment with SB203580                                                                            | 5 h inhibitor treatment. ATF-2 protein is involved in c-Jun transcription | Gratton et al. (2001)     |
| p38 induces c-Fos transcription     | In vitro (COS-7)  | Isolated purified p38 from UV-stimulated COS-7                                                                                | Performed kinase assay with Elk1                                                 | Activated p38 from UV-treated COS-7 cells induced phosphorylation of Elk1                                                                                                            | Elk1 protein is involved in c-Fos transcription                           | Whitmarsh et al. (1997)   |
| p38 phosphorylates c-Jun            | In vitro (HUVEC)  | Endogenous pathway                                                                                                            | PMA + pharmacological p38 inhibitor SB202190                                     | PMA-induced c-Jun phosphorylation at S63/S73 was abolished after pretreatment with SB202190                                                                                          | 10 min PMA stimulation                                                    | Humar et al. (2007)       |
| p38 phosphorylates c-Fos            | In vitro (HEK293) | Transfection with pCEFL-HA-SAPKs (p38 $\alpha$ / $\beta$ / $\gamma$ / $\delta$ ) and pCEFL-GFP-c-Fos TAD with or without MKK6 |                                                                                  | p38( $\alpha$ / $\beta$ / $\gamma$ / $\delta$ ) shifted c-Fos TAD detected by anti-GFP antibodies for all p38 isotypes in presence of MKK6, indicating c-Fos protein phosphorylation | MKK6 is an upstream activator of p38                                      | Tanos et al. 2005         |
| JNK induces c-Fos transcription     | In vitro (HeLa)   | Transiently transfected with MEKK1                                                                                            |                                                                                  | MEKK1 increased JNK protein phosphorylation status, which corresponded with c-Fos mRNA levels                                                                                        | MEKK1 is an upstream activator of JNK                                     | Cavigelli et al. (1995)   |
| TNF $\alpha$ activates AKT and PI3K | In vitro (HUVEC)  | Endogenous pathway                                                                                                            | TNF $\alpha$                                                                     | TNF $\alpha$ increased AKT and PI3K protein phosphorylation status                                                                                                                   | 0-240 min TNF $\alpha$ stimulation                                        | Lo et al. (2014)          |
| LPS activates AKT and PI3K          | In vitro (HUVEC)  | Endogenous pathway                                                                                                            | LPS                                                                              | LPS increased AKT and PI3K protein phosphorylation status                                                                                                                            | 0-60 min LPS stimulation                                                  | Xu et al. (2013)          |

**APC/S1P-related connections**

| <b>Interaction</b>                    | <b>In vitro/vivo</b> | <b>Endogenous pathway or overexpression</b> | <b>Treatment / Intervention</b>                             | <b>Effect</b>                                                                                        | <b>Miscellaneous</b>                                                                      | <b>Author</b>                  |
|---------------------------------------|----------------------|---------------------------------------------|-------------------------------------------------------------|------------------------------------------------------------------------------------------------------|-------------------------------------------------------------------------------------------|--------------------------------|
| APC inhibits thrombin                 | Human plasma         | Endogenous pathway                          | APC                                                         | APC decreased thrombin protein levels in plasma                                                      |                                                                                           | Nicolaes et al. (1997)         |
| APC activates PAR1                    | In vitro (HUVEC)     | Endogenous pathway                          | APC                                                         | APC induced gene expression profile comparable to that induced by PAR1 agonist                       |                                                                                           | Riewald et al. (2002)          |
| APC-PAR1 activates SK1                | In vitro (HUVEC)     | Endogenous pathway                          | APC + SK1 siRNA or S1PR1 siRNA                              | Barrier protective effect of APC-PAR1 was lost upon knockdown of SK1 or S1PR1                        | 3 h APC stimulation                                                                       | Feistritzer et al. (2005)      |
| Thrombin-PAR1 activates RhoA          | In vitro (HUVEC)     | Endogenous pathway                          | PAR1-activating peptides (PAR1-AP)                          | Activated RhoA protein levels were increased after PAR1-AP treatment                                 | 20 min PAR1-AP stimulation                                                                | Vouret-Craviari et al. (2003)  |
| NF-κB transcription inhibits TM       | In vitro (BAEC)      | Endogenous pathway                          | TNFα                                                        | TNFα lowered TM protein levels and activity                                                          | 6-8 h TNFα stimulation                                                                    | Moore et al. (1989)            |
|                                       | In vitro (HUVEC)     | Endogenous pathway                          | TNFα + pharmacological NF-κB blockade (parthenolide)        | TNFα-mediated TM downregulation was inhibited at mRNA and protein level after parthenolide treatment | 16 h TNFα stimulation                                                                     | Sohn et al. (2005)             |
|                                       | In vivo (mice)       | Plasmids with IκB super-repressor (IκBsr)   | TNFα + pre-treatment with IκBsr plasmids for NF-κB blockade | TNFα-mediated TM downregulation was inhibited at mRNA and protein level in IκBsr-transduced animals  | TM levels in whole lung extracts 16 h after TNFα injection via intratracheal installation |                                |
|                                       | In vitro (BAEC)      | Endogenous pathway                          | TNFα + pharmacological NF-κB blockade (parthenolide)        | TNFα-mediated TM downregulation was inhibited at protein level                                       | 10 h TNFα stimulation                                                                     | Lin et al. (2010)              |
| TM/EPCR/thrombin complex activates PC | In vitro (HUVEC)     | Endogenous pathway                          | EPCR-inhibitory antibodies                                  | EPCR-inhibitory antibody decreased APC protein levels                                                |                                                                                           | Stearns-Kurosawa et al. (1996) |
|                                       | In vivo (baboons)    | Endogenous pathway                          | Thrombin + EPCR-inhibitory antibodies                       | EPCR-inhibitory antibody decreased APC protein levels in plasma                                      | APC levels were monitored 2 h                                                             | Taylor et al. (2001)           |

|                                                      |                        |                                                                        |                                                                                      |                                                                                                                           |                                                                                        |                               |
|------------------------------------------------------|------------------------|------------------------------------------------------------------------|--------------------------------------------------------------------------------------|---------------------------------------------------------------------------------------------------------------------------|----------------------------------------------------------------------------------------|-------------------------------|
| NF- $\kappa$ B activates SPP2                        | In vitro (HUVEC)       | Endogenous pathway                                                     | TNF $\alpha$ + RelA siRNA                                                            | TNF $\alpha$ -mediated SPP2 upregulation was inhibited at mRNA level by RelA knockdown                                    | 8 h TNF $\alpha$ stimulation                                                           | Mechtcheriakova et al. (2007) |
| SPNS2 transports S1P                                 | In vivo (mice)         | Endogenous pathway                                                     | Genetic disruption of SPNS2 gene                                                     | SPNS2-deficient mice showed reduced S1P plasma levels                                                                     |                                                                                        | Hisano et al. (2012)          |
|                                                      | In vitro (HUVEC/HPAEC) | Endogenous pathway                                                     | SPNS2 siRNA                                                                          | Loss of SPNS2 reduced S1P plasma levels                                                                                   |                                                                                        |                               |
| S1P associates with HDL/albumin                      | Human blood            | Endogenous pathway                                                     | S1P                                                                                  | S1P predominantly bound to HDL and albumin                                                                                |                                                                                        | Aoki et al. (2005)            |
| HDL-bound S1P activates S1PR1                        | In vitro (HUVEC)       | Endogenous pathway                                                     | apoM <sup>+</sup> HDL containing S1P + pharmacological S1PR1 inhibitor VPC44116      | apoM <sup>+</sup> HDL activated downstream targets of S1PR1, which was reversed in the presence of VPC44116               | 10 min apoM <sup>+</sup> HDL stimulation                                               | Christoffersen et al. (2011)  |
|                                                      | In vivo (mice)         | Genetic overexpression of apoM <sup>+</sup> or apoM <sup>-/-</sup> HDL |                                                                                      | apoM <sup>-/-</sup> HDL mice exhibited decreased endothelial lung barrier function compared to apoM <sup>+</sup> HDL mice | Endothelial lung barrier function was assessed via Evans Blue staining                 |                               |
| AKT phosphorylates S1PR1-T236                        | In vitro (HUVEC)       | Endogenous pathway                                                     |                                                                                      | AKT associated with S1PR1 and phosphorylated T236                                                                         |                                                                                        | Lee et al. (2001)             |
| S1PR1-T236 phosphorylation activates Rac1            | In vitro (CHO)         | Transduced with S1PR1-T236 mutant                                      | S1P                                                                                  | S1P/S1PR1-induced Rac1 activation was inhibited by S1PR1-T236 mutant                                                      |                                                                                        |                               |
| S1PR1 activates ERK                                  | In vitro (HUVEC)       | Endogenous pathway                                                     | FTY720P (S1PR agonist)                                                               | ERK protein phosphorylation status was increased by FTY720P treatment                                                     | 5 h FTY720P stimulation                                                                | Mullershausen et al. (2009)   |
| S1PR2 activates RhoA                                 | In vitro (HUVEC)       | Endogenous pathway                                                     | S1P (10 $\mu$ M) + pharmacological S1PR1 inhibitor VPC23019 / S1PR2 inhibitor JTE013 | S1P increased RhoA activity, which was reverted by JTE013, but not by VPC23019                                            | S1P increased RhoA activity after 2-5 min, and returned to control levels after 10 min | Li et al. 2015                |
| S1P stimulates endothelial barrier function via Rac1 | In vitro (HUVEC)       | Endogenous pathway                                                     | S1P (0.5 $\mu$ M) + pharmacological Rac1 inhibitor NSC23766                          | S1P-mediated increase in TEER was hampered by NSC23766                                                                    | Effect of S1P on TEER was visible after 10 min                                         |                               |



|                                                    |                                             |                        |                                                         |                                                                                  |  |                          |
|----------------------------------------------------|---------------------------------------------|------------------------|---------------------------------------------------------|----------------------------------------------------------------------------------|--|--------------------------|
| S1P inhibits endothelial barrier function via RhoA | In vitro (HUVEC)                            | Endogenous pathway     | S1P (10 $\mu$ M) + pharmacological ROCK inhibitor H1152 | S1P-mediated decrease in TEER was attenuated by H1152                            |  |                          |
| SPP2 dephosphorylates S1P                          | In vitro (HEK293)                           | Overexpression of SPP2 | S1P                                                     | SPP2 overexpressing cells displayed lower levels of S1P and higher levels of Sph |  | Ogawa et al. (2003)      |
| SPL degrades S1P                                   | In vivo (mouse)                             | Endogenous pathway     | Pharmacological SPL inhibitor FTY720                    | FTY720 induced an increase in S1P levels in spleen and thymus                    |  | Bandhuvula et al. (2005) |
| LPP dephosphorylates S1P                           | In vitro (ras-transformed rat2 fibroblasts) | Overexpression of LPP  |                                                         | Increased S1P dephosphorylation during overexpression of LPP                     |  | Jasinska et al. (1999)   |

### Angpt/Tie2-related connections

| Interaction                  | In vitro/vivo      | Endogenous pathway or overexpression                                                  | Treatment / Intervention                                     | Effect                                                                                                                      | Miscellaneous                                                    | Author                 |
|------------------------------|--------------------|---------------------------------------------------------------------------------------|--------------------------------------------------------------|-----------------------------------------------------------------------------------------------------------------------------|------------------------------------------------------------------|------------------------|
| Tie1 activates Tie2          | In vivo (mice)     | Endogenous pathway                                                                    | LPS                                                          | Tie1 is cleaved after LPS injection, leading to reduced Tie2 signaling (AKT protein phosphorylation status)                 | Sacrificed 16 h after LPS administration. Studied in lung lysate | Korhonen et al. (2016) |
| Tie2 activates ABIN-2        | In vitro (HUVEC)   | Transfection with plasmids for FLAG-ABIN-2                                            | Angpt1                                                       | Angpt1-dependent activation of Tie2 induced Tie2/ABIN-2 complex formation shown by coimmunoprecipitation                    | 10 min Angpt1 stimulation                                        | Hughes et al. (2003)   |
| ABIN-2 inhibits IKK          | In vitro (HEK293T) | Transfection with plasmids for ABIN-2 or ABIN-2 mutant with defect IKK binding domain | TNF $\alpha$                                                 | ABIN-2 prevented TNF $\alpha$ -induced NF- $\kappa$ B signaling, but mutated ABIN-2 did not                                 | 4 h TNF $\alpha$ stimulation                                     | Liu et al. (2004)      |
| Tie2 activates Rac1 via PI3K | In vitro (HMVEC-L) | Endogenous pathway                                                                    | Angpt1 + pharmacological PI3K inhibitor LY294002             | Angpt1-induced increase in activated Rac1 protein levels was reverted by LY294002                                           | 30 min Angpt1 stimulation                                        | Mammoto et al. (2007)  |
| Tie2 activates mDia via RhoA | In vitro (SVEC)    | Endogenous pathway                                                                    | Angpt1 + RhoA siRNA                                          | Interaction of mDia and Src was abolished in absence of Angpt1 or by RhoA siRNA                                             | 15 min Angpt1 stimulation                                        | Gavard et al. (2008)   |
| Tie2 activates ERK via Ras   | In vitro (HUVEC)   | Endogenous pathway                                                                    | Angpt1                                                       | Angpt1 increased ERK1 and ERK2 protein phosphorylation status                                                               | 0-60 min Angpt1 stimulation                                      | Kim et al. (2002)      |
| ERK activate SK1             | In vitro (HEK293)  | Overexpressing SK1                                                                    | TNF $\alpha$ or PMA + pharmacological ERK1/2 inhibitor U0126 | TNF $\alpha$ /PMA-induced increase in ERK protein phosphorylation status and SK1 activity were abolished by U0126 treatment | 30 min TNF $\alpha$ /PMA stimulation                             | Pitson et al. (2003)   |
| APC activates Tie2           | In vivo (mice)     | Endogenous pathway                                                                    | APC + LPS + Tie2 inhibitor (Tie2-I)                          | APC protection against LPS-induced leakage after 4 h and 24 h in lung and kidney was                                        |                                                                  | Minhas et al. (2017)   |

|                                                |                         |                                           |                                                    |                                                                                                                                                        |                               |                     |
|------------------------------------------------|-------------------------|-------------------------------------------|----------------------------------------------------|--------------------------------------------------------------------------------------------------------------------------------------------------------|-------------------------------|---------------------|
|                                                |                         |                                           |                                                    | reversed by Tie2-inhibitor treatment                                                                                                                   |                               |                     |
|                                                | In vitro (HUVEC)        | Endogenous pathway                        | APC                                                | APC treatment increased Tie2 protein phosphorylation status                                                                                            | 2 min APC stimulation         |                     |
| Angpt1/2 inhibit TM-dependent formation of APC | In vitro (HUVEC)        | Endogenous pathway                        | Protein C + thrombin + Angpt1 or Angpt2            | Relative levels of APC were decreased in a concentration-dependent manner in presence of Angpt1 or Angpt2                                              | 60 min Angpt1/2 stimulation   | Daly et al. (2018)  |
|                                                | Isolated proteins       | Endogenous pathway                        | Soluble TM + thrombin + Angpt1 or Angpt2           | Levels of thrombin bound to TM are reduced in presence of Angpt1 or Angpt2                                                                             |                               |                     |
| MMP14 cleaves Tie2                             | In vitro (HUVEC)        | Endogenous pathway                        | MMP14 siRNA                                        | MMP14 knockdown lowered cleaved soluble Tie2 (sTie2) levels                                                                                            |                               | Thamm et al. (2018) |
| TNF $\alpha$ activates MMP14                   | In vitro (HUVEC)        | Endogenous pathway                        | TNF $\alpha$ + MMP14 siRNA                         | TNF $\alpha$ increased sTie2 levels, which was reverted by MMP14 knockdown                                                                             | 24 h TNF $\alpha$ stimulation |                     |
| VE-PTP dephosphorylates Tie2                   | In vitro (HUVEC/HEK293) | Transfected with VE-PTP-GFP and Tie2-FLAG | Pharmacological VE-PTP-inhibitor AKB-9785 + Angpt2 | Angpt2 failed to phosphorylate Tie2 in presence of VE-PTP (HEK293), but increased Tie2 protein phosphorylation status after AKB-9785 treatment (HUVEC) |                               | Souma et al. (2018) |

**VEGF/VEGFR2-related connections**

| <b>Interaction</b>                         | <b>In vitro/vivo</b>                                                                | <b>Endogenous pathway or overexpression</b>           | <b>Treatment / Intervention</b>                                 | <b>Effect</b>                                                                                                                         | <b>Miscellaneous</b>      | <b>Author</b>        |
|--------------------------------------------|-------------------------------------------------------------------------------------|-------------------------------------------------------|-----------------------------------------------------------------|---------------------------------------------------------------------------------------------------------------------------------------|---------------------------|----------------------|
| AKT is downstream of Src via PI3K          | In vitro (HCAEC)                                                                    | Endogenous pathway                                    | VEGF + p47 siRNA (p47 is essential for VEGFR2 -> Src signaling) | VEGF-induced increase in Src and AKT protein phosphorylation status were abolished by p47 knockdown                                   | 0-15 min VEGF stimulation | Lee et al. (2011)    |
| VEGFR2 activates ERK via Ras               |                                                                                     |                                                       |                                                                 | VEGF-induced increase in ERK protein phosphorylation status was unaffected by p47 knockdown                                           |                           |                      |
| VEGF activates PI3K/AKT via VEGFR2/Src/Axl | In vitro (porcine aortic endothelial cells stably expressing human VEGFR2; PAE/KDR) | Cells were stably expressing human VEGFR2             | VEGF + Axl shRNA                                                | VEGF-induced increase in AKT protein phosphorylation status was abolished in Axl shRNA treated cells compared to empty vector control | 0-20 min VEGF stimulation | Ruan et al. (2012)   |
| VEGFR2 activates Vav2 via Src              | In vitro (SVEC)                                                                     | Endogenous pathway                                    | VEGF + pharmacological VEGFR2 inhibitor su1498                  | VEGF-induced increase in Src protein phosphorylation status was abolished by su1498 treatment                                         | 10 min VEGF stimulation   | Gavard et al. (2006) |
|                                            |                                                                                     |                                                       | VEGF + Src siRNA                                                | VEGF-induced increase in Vav2 protein phosphorylation status was abolished by Src knockdown                                           |                           |                      |
| Vav2 activates PAK via Rac1                |                                                                                     |                                                       | VEGF + Vav2 shRNA                                               | VEGF-induced increase in activated Rac1 protein levels was abolished by Vav2 shRNA treatment                                          | 5 min VEGF stimulation    |                      |
|                                            | In vitro (COS-7)                                                                    | Transfection with PAK                                 | Isolated Rac1 proteins                                          | Rac1 increased PAK protein phosphorylation status                                                                                     |                           | Knaus et al. (1998)  |
| PAK phosphorylates VE-cadherin             | In vitro (SVEC)                                                                     | Transfection with auto-inhibitory domain of PAK (PID) | VEGF                                                            | VEGF-induced increase in VE-cadherin protein phosphorylation status was abolished by PID transfection                                 | 5 min VEGF stimulation    | Gavard et al. (2006) |

|                                                              |                                                   |                                                                        |                                                           |                                                                                                                                                          |                                                                                                          |                       |
|--------------------------------------------------------------|---------------------------------------------------|------------------------------------------------------------------------|-----------------------------------------------------------|----------------------------------------------------------------------------------------------------------------------------------------------------------|----------------------------------------------------------------------------------------------------------|-----------------------|
| VE-cadherin phosphorylation leads to its internalisation     | In vitro (SVEC)                                   | Transfection with WT or non-phosphorylatable VE-cadherin (S665V)       | VEGF                                                      | VEGF-induced increase in WT VE-cadherin protein internalisation was inhibited in S665V expressing cells                                                  | 30 min VEGF stimulation                                                                                  |                       |
| VE-PTP inhibits VE-cadherin phosphorylation                  | In vitro (CHO)                                    | Transfection with VEGFR2, VE-cadherin and inducible inactivated VE-PTP | Mifepristone (to induce expression of inactivated VE-PTP) | VE-cadherin protein phosphorylation status and paracellular permeability (FITC) were reduced by induction of both WT and inactivated VE-PTP              | Study shows that VE-PTP does not require its phosphatase activity to prevent VE-cadherin phosphorylation | Nawroth et al. (2002) |
| Tie2 stimulates VE-PTP-dependent dephosphorylation of VEGFR2 | In vitro (HUVEC)                                  | Endogenous pathway                                                     | Angtp1 + VEGF + VE-PTP siRNA                              | VEGF-induced increase in VEGFR2 protein phosphorylation status was reduced by co-stimulation with Angtp1. This effect was abolished by VE-PTP knockdown  |                                                                                                          | Hayashi et al. (2013) |
|                                                              |                                                   |                                                                        | VEGF + Tie2 siRNA                                         | VEGF-induced VEGFR2 protein phosphorylation status was increased in Tie2 knockdown cells                                                                 |                                                                                                          |                       |
| mDia sequesters Src and competes with VEGFR2                 | In vitro (Seminal Vesicle Epithelial Cells; SVEC) | Transfected with myc-active mDia1                                      | VEGF + increasing levels of mDia1 activity                | VEGF-stimulated VEGFR2 association with Src was reduced in a dose-dependent manner by mDia1, while mDia1 association with Src increased dose-dependently | 5 min VEGF stimulation                                                                                   | Gavard et al. (2008)  |
| Src phosphorylates FAK                                       | In vitro (COS-7)                                  | Transfected with WT FAK                                                | Isolated c-Src                                            | FAK protein phosphorylation status was increased on several activation sites upon exposure to Src                                                        |                                                                                                          | Calalb et al. (1995)  |

|                       |                                               |                                                |                                          |                                                                                                      |                                  |                    |
|-----------------------|-----------------------------------------------|------------------------------------------------|------------------------------------------|------------------------------------------------------------------------------------------------------|----------------------------------|--------------------|
| FAK activates Ras/ERK | In vivo (chick chorioallantoic membrane; CAM) | Transduction with FAK-related nonkinase (FRNK) | VEGF                                     | VEGF-induced increase in activated Ras and ERK protein phosphorylation status were inhibited by FRNK |                                  | Hood et al. (2003) |
| Src activates Ras/ERK |                                               | Endogenous pathway                             | VEGF + pharmacological Src inhibitor PP1 | VEGF-induced increase in Raf and ERK protein phosphorylation status was inhibited by PP1             | Raf is located downstream of Ras |                    |
